# Supplementary material for: Self-assembly of a Ag nanoparticle-modified and graphene-wrapped TiO2nanobelt ternary heterostructure: surface charge tuning toward efficient photocatalysis
Source: Royal Society of Chemistry journal article supplement (doi:10.1039/c4nr03115f), 2014-07-25
Supplement: c4nr03115f1.pdf [file c4nr03115f1.pdf]

## ***Supporting information***

# **Self-Assembly of Ag Nanoparticle Modified and Graphene Wrapped TiO<sub>2</sub> Nanobelt Ternary Heterostructure: Surface Charge Tuning Toward Efficient Photocatalyst**

*Junyu Zhang,<sup>a</sup> Fang-Xing Xiao,<sup>b\*</sup> Guangcan Xiao,<sup>a\*</sup> Bin Liu<sup>b\*</sup>*

*a.* College of Chemistry, Instrumental Measurement and Analysis Center, Fuzhou University,

Fuzhou, 350002, People's Republic of China.

*b.* School of Chemical and Biomedical Engineering, Nanyang Technological University, 62

Nanyang Drive, Singapore 637459, Singapore. Fax: (65) 6794-7553; Tel: (65) 6513-7971;

E-mail: [fangxing2010@gmail.com](mailto:fangxing2010@gmail.com)

[xgc@fzu.edu.cn](mailto:xgc@fzu.edu.cn)

[liubin@ntu.edu.sg](mailto:liubin@ntu.edu.sg)

## ***Experimental***

### ***Synthesis of Graphene Oxide (GO)***

GO sheets were synthesized from crystalline graphite powder using a modified Hummers method.<sup>[1, 2]</sup> In a typical synthesis, 10 g of graphite powder was added to 230 mL of concentrated H<sub>2</sub>SO<sub>4</sub> (98 %) which was cooled in an ice bath. Following, 30 g of KMnO<sub>4</sub> was added slowly to the above solution with gentle stirring for 10 min. Temperature of the mixed solution was then raised to 35 °C and kept for 2 h to completely oxidize graphite. Afterwards, the mixture was diluted with 460 mL of DI H<sub>2</sub>O and further diluted by 1.4 L of DI H<sub>2</sub>O 5 min later under vigorous stirring. 50 mL of H<sub>2</sub>O<sub>2</sub> was then added to the mixture and a brilliant yellow product was formed along with bubbling. The mixture was filtered and washed by 1 : 10 HCl aqueous solution to remove metal ions and by DI H<sub>2</sub>O to remove residual acid. The filter cake thus-obtained was dispersed in DI H<sub>2</sub>O with a mechanical agitation and centrifuged at 4500 rpm for 2 min and 5 cycles to remove small GO pieces and water-soluble byproducts. The final sediment was dialyzed for two-weeks to remove impurity atoms and then re-dispersed in DI H<sub>2</sub>O with mechanical agitation or mild sonication to result in exfoliated GO aqueous solution.

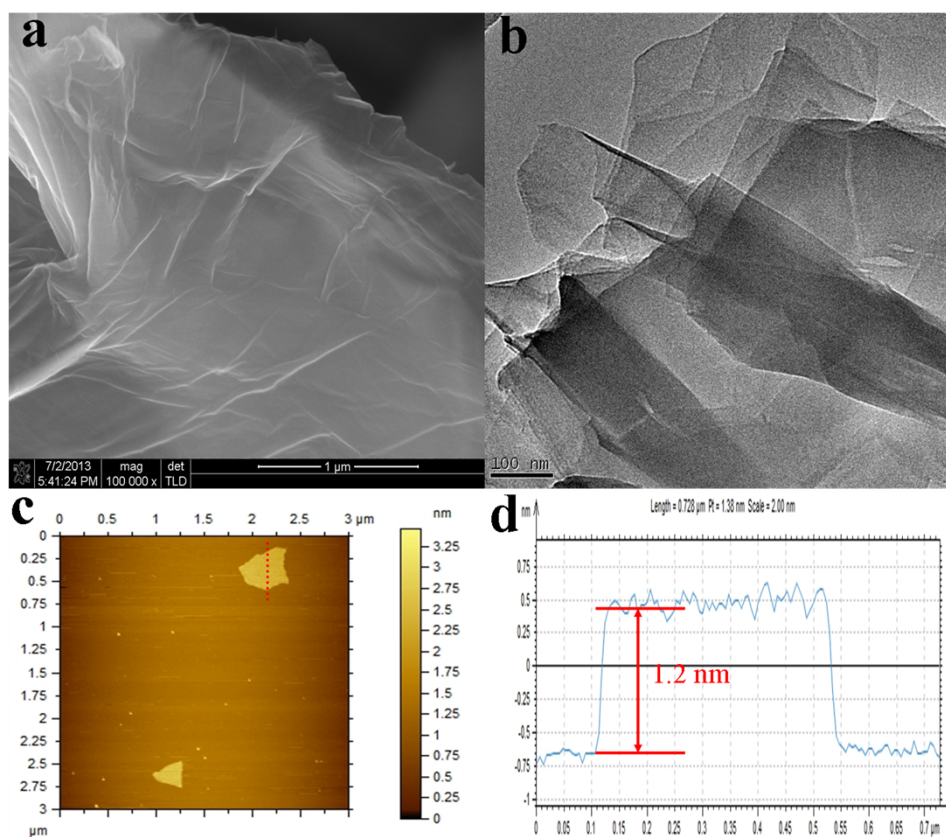

**Figure S1.** (a) FESEM, (b) TEM, (c) AFM image and (d) corresponding height profile of GO aqueous solution.

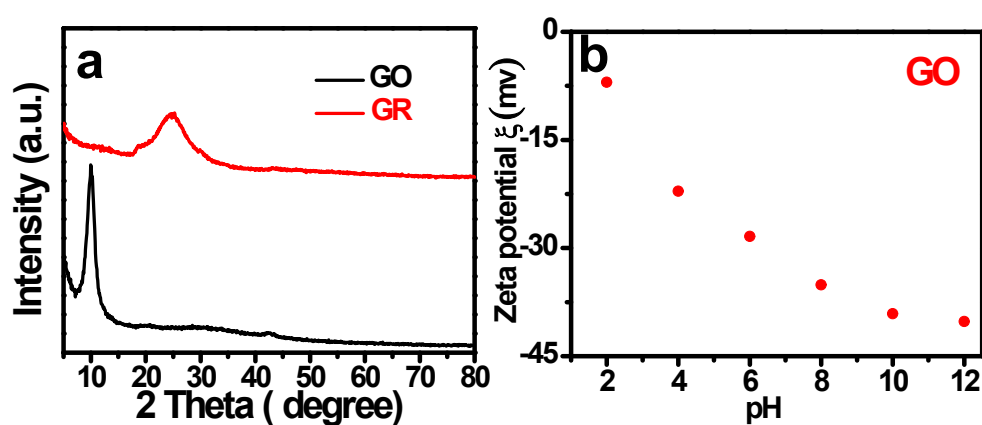

**Figure S2.** (a) XRD patterns of GO and GR, and (b) Zeta potential of GO aqueous solutions.

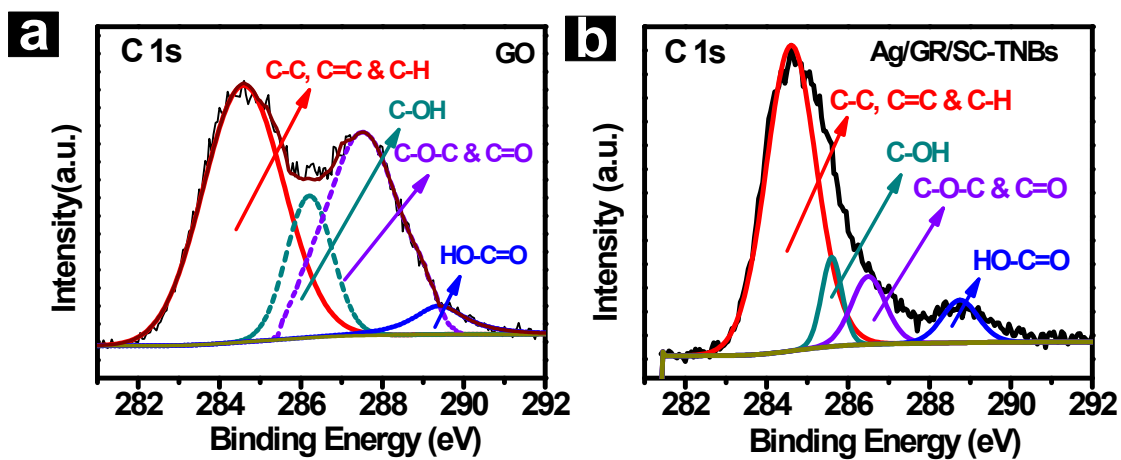

**Figure S3.** High-resolution XPS spectra of C 1s for (a) GO and (b) Ag/GR/SC-TNBs ternary heterostructure.

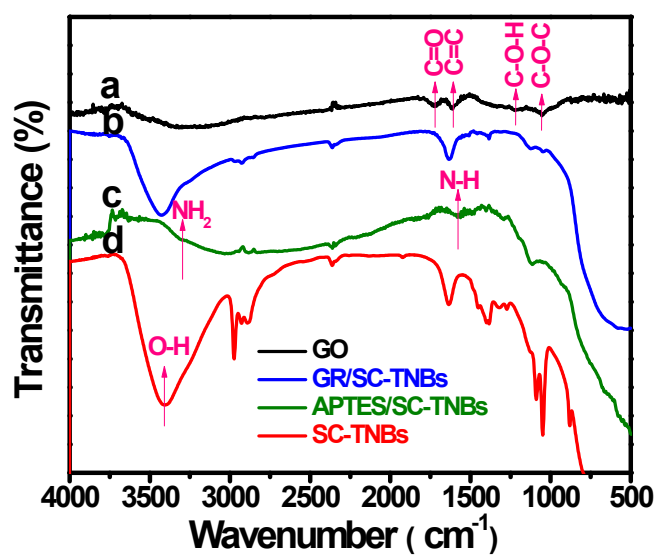

**Figure S4.** FTIR spectra of (a) GO, (b) GR/SC-TNBs, (c) APTES-SC-TNBs, and (d) SC-TNBs.

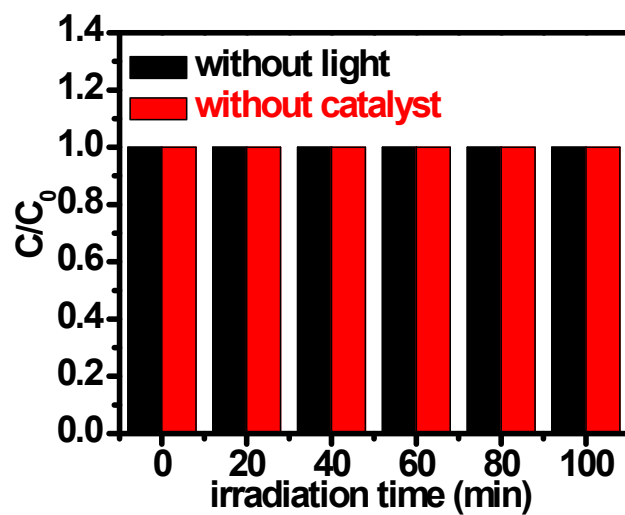

**Figure S5.** Blank experiments for photodegradation of RhB without light and catalyst.

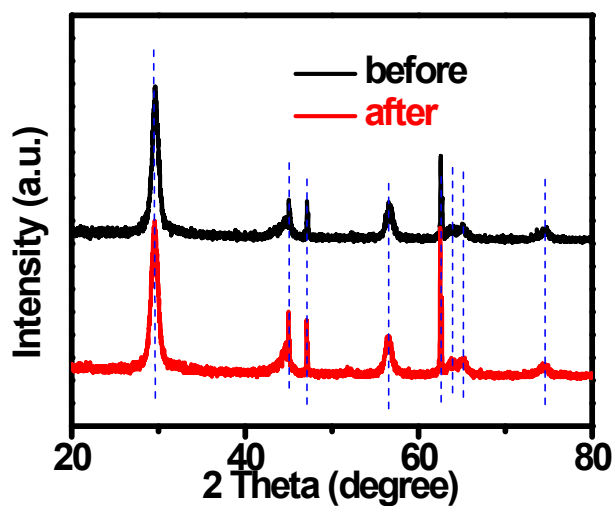

**Figure S6.** XRD patterns of Ag/GR/SC-TNBs ternary heterostructure before and after recycling photocatalytic reactions.

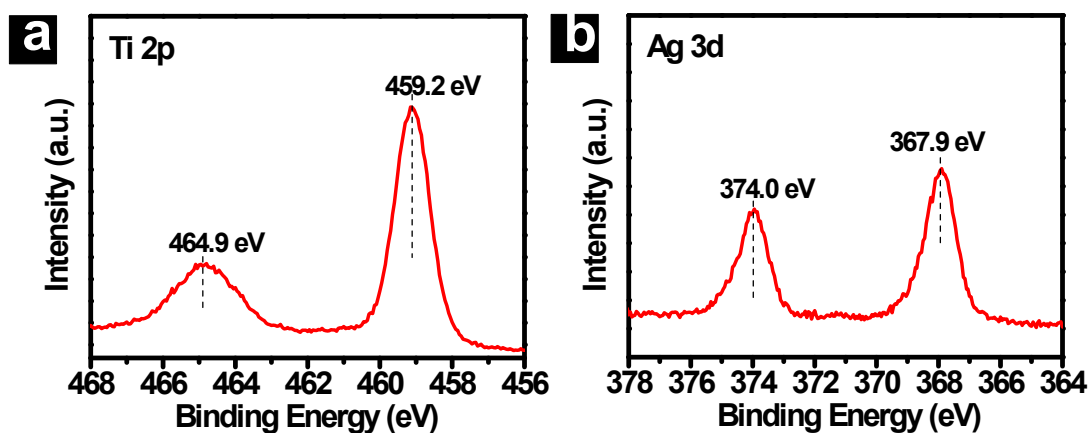

**Figure S7.** High-resolution XPS spectra of Ag 3d and Ti 2p of Ag/GR/SC-TNBs ternary heterostructure after recycling photocatalytic reactions.

## References

- [1] F. -X. Xiao, J. Miao, B. Liu, *J. Am. Chem. Soc.* **2014**, *136*, 1559-1569.
- [2] W. S. Hummers, R. E. Offeman, *J. Am. Chem. Soc.* **1958**, *80*, 1339-1339.
